# Supplementary material for: Variability in Price of Generic Antipsychotic Medications at Community Pharmacies
Source: Atypon-hosted journal article supplement (doi:10.1176/appi.ps.201900319), 2020-06-24
Supplement: appi.ps.201900319.ds001.pdf [file appi.ps.201900319.ds001.pdf]

 


Psychiatry Online
